# Supplementary material
Source: PubMed Central journal article supplement (PMC2268583)

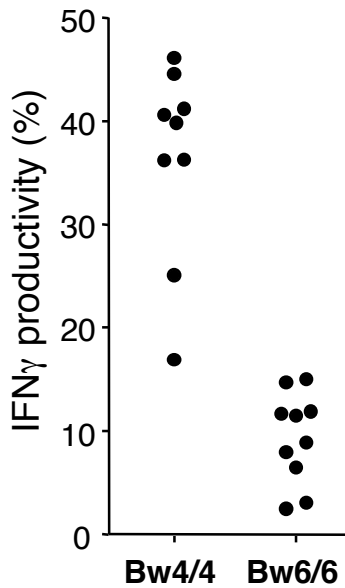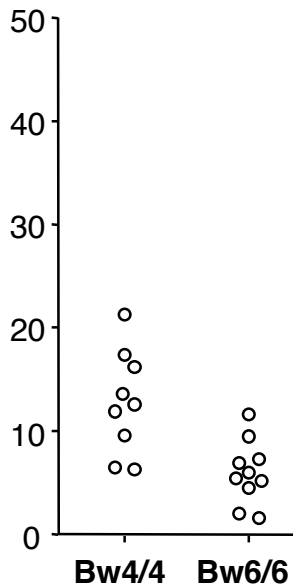

Supplement: pnas_0712229105_1.pdf [file pnas_0712229105_1.pdf]
